# Supplementary material
Source: HighWire-hosted journal article supplement (http://ajnr-stage2.highwire.org/highwire/filestream/67373/field_highwire_adjunct_files/0/18-01214.pdf)
Supplement: 18-01214.pdf [file 18-01214.pdf]

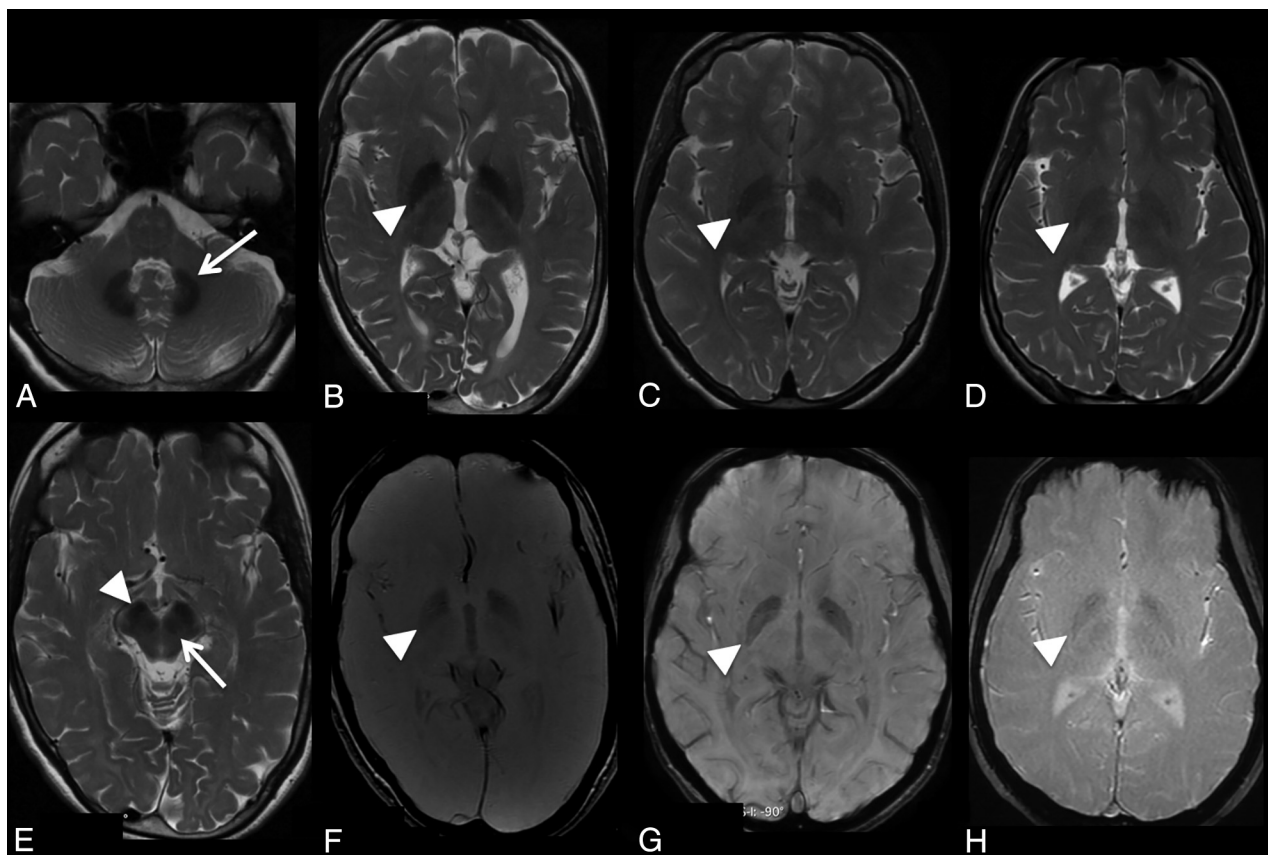

**ON-LINE FIGURE.** Axial T2-weighted images from patient 2 (A and E) show bilateral hypointensities of the dentatenucleus (A, *arrow*), the substantia nigra (E, *arrowhead*), and the red nucleus (E, *arrow*). Axial T2- (B–D) and magnetic susceptibility- (F–H) weighted images show bilateral hypointensities of the pallidum (*arrowheads*) of patients 2 (B and F), 5 (C and G), and 6 (D and H).
